# Supplementary material for: Impacts of Mn ion in ZnSe passivation on electronic band structure for high efficiency CdS/CdSe quantum dot solar cells
Source: Royal Society of Chemistry journal article supplement (doi:10.1039/c8dt01943f), 2018-01-01
Supplement: c8dt01943f1.pdf [file c8dt01943f1.pdf]

## Supplementary information

### Impacts of the Mn-ion in the ZnSe Passivation on Electronic Band Structure for High Efficiency CdS/CdSe Quantum Dots Solar Cells

Shuqi Lu,<sup>a</sup> Shanglong Peng,<sup>\*a</sup> Zhiya Zhang,<sup>a</sup> Yunlong Deng,<sup>a</sup> Tianfeng Qin,<sup>a</sup> Juanjuan Huang,<sup>a</sup> Fei Ma,<sup>a</sup> Juan Hou,<sup>\*b</sup> and Guozhong Cao<sup>\*a,b</sup>

a. School of Physical Science and Technology, Lanzhou University, Lanzhou 730000, P.R. China. E-mail: pengshl@lzu.edu.cn.

b. Department of Materials Science and Engineering, University of Washington, Seattle, Washington 98195-2120, United States. E-mail: [gzc@u.washington.edu](mailto:gzc@u.washington.edu).

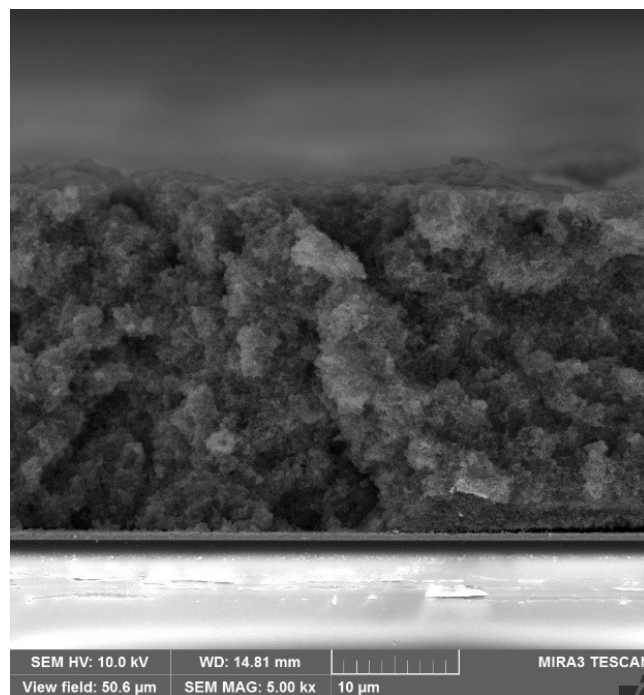

**Figure S1.** SEM cross-sectional image of the photoanode. It's obviously that the thickness of deposited  $\text{TiO}_2$  film is about 25  $\mu\text{m}$ .

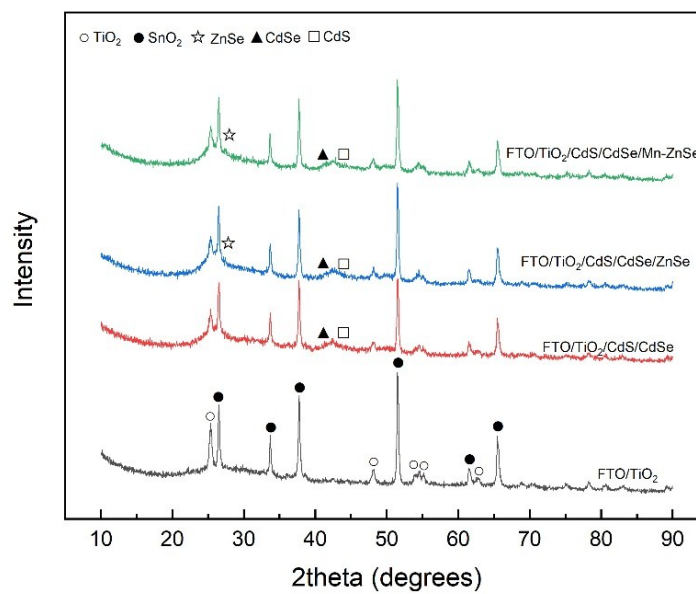

**Figure S2.** XRD pattern of  $\text{FTO/TiO}_2$ ,  $\text{FTO/TiO}_2/\text{QDs}$ ,  $\text{FTO/TiO}_2/\text{QDs/ZnSe}$  and  $\text{FTO/TiO}_2/\text{QDs/Mn-ZnSe}$  films.

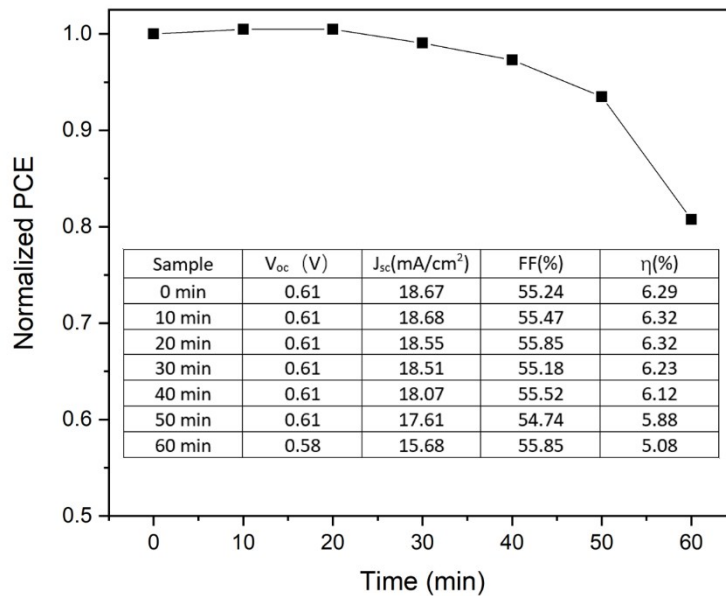

**Figure S3.** Stability of QDSSCs with passivation layer of Mn-ZnSe. The inset table is photovoltaic parameters corresponding to different time.
